# Supplementary material for: One-step deposition of antibacterial Ag@Pdop hybrid films on an NiTi alloy
Source: Royal Society of Chemistry journal article supplement (doi:10.1039/c9ra05764a), 2019-01-01
Supplement: c9ra05764a1.pdf [file c9ra05764a1.pdf]

**Table S1** Chemical composition of unmodified NiTi, Pdop and Ag@Pdop

| Sample    | Atomic percentage (%) |       |       |      |       |      |
|-----------|-----------------------|-------|-------|------|-------|------|
|           | C                     | O     | N     | Ag   | Ti    | Ni   |
| NiTi      | 44.96                 | 39.36 | -     | -    | 12.52 | 3.16 |
| Pdop      | 74.34                 | 18.11 | 7.55  | -    | -     | -    |
| Ag@1Pdop  | 73.53                 | 17.48 | 8.29  | 0.34 | 0.2   | 0.16 |
| Ag@6Pdop  | 71.78                 | 17.05 | 10.07 | 0.84 | 0.25  | -    |
| Ag@12Pdop | 81.39                 | 13.31 | 4.66  | 0.64 | -     | -    |
| Ag@18Pdop | 76.13                 | 15.91 | 7.45  | 0.51 | -     | -    |
| Ag@24Pdop | 72.56                 | 19.02 | 8.08  | 0.35 | -     | -    |

**Table S2**  $E_{corr}$ ,  $I_{corr}$ , and  $E_{pit}$  of the polished NiTi, Pdop, and Ag@Pdop in Hank's solution

| sample    | $E_{corr}/V$ | $I_{corr}/A \cdot cm^{-2}$ | $E_{pit}/V$ |
|-----------|--------------|----------------------------|-------------|
| NiTi      | -0.36        | 1.43E-7                    | 0.37        |
| Pdop      | -0.09        | 2.07E-8                    | -           |
| Ag@1Pdop  | -0.09        | 1.2E-7                     | -           |
| Ag@6Pdop  | -0.07        | 1.4E-7                     | -           |
| Ag@12Pdop | -0.06        | 6.3E-8                     | -           |
| Ag@18Pdop | -0.07        | 3.2E-8                     | -           |
| Ag@24Pdop | -0.07        | 1.2E-8                     | -           |

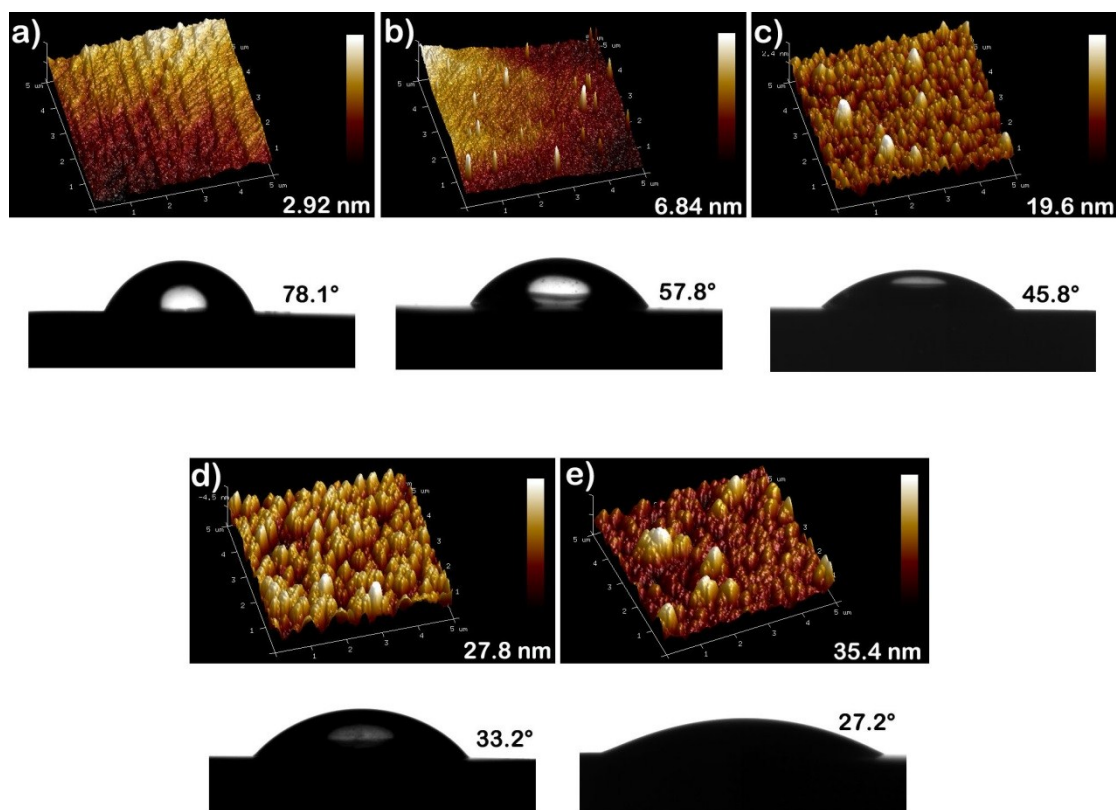

**Fig.S1** The surface roughness (upper) and hydrophilicity (lower), a) polished NiTi, b) Pdop, c) Ag@6Pdop, d) Ag@12Pdop, and f) Ag@24Pdop

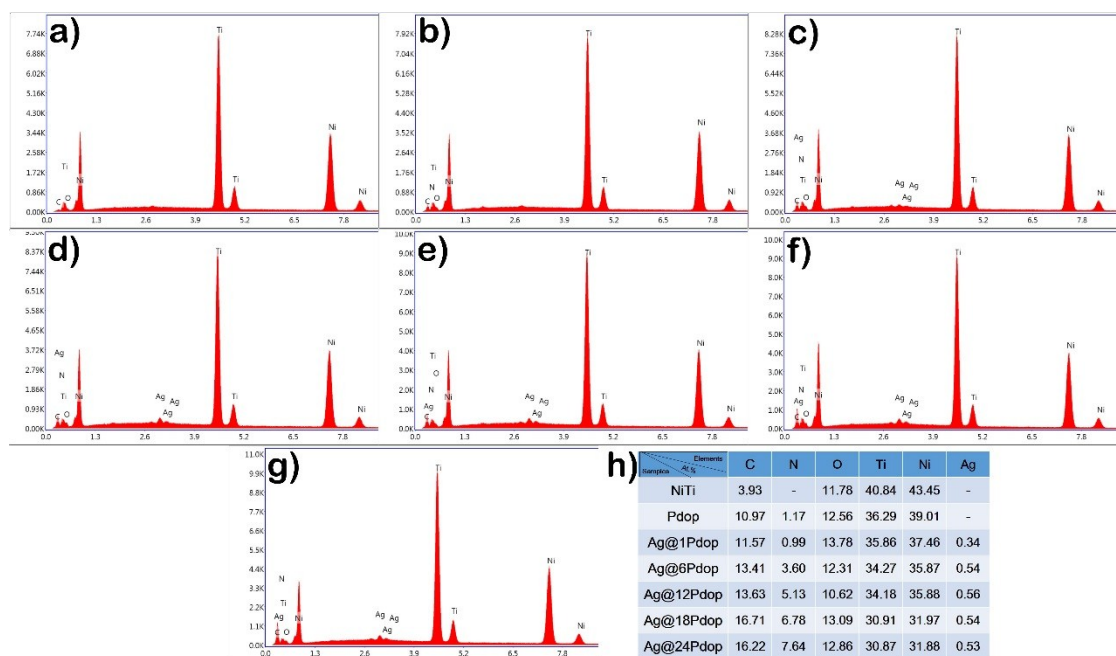

**Fig. S2** EDAX spectra of the samples, a) NiTi, b) Pdop, c) Ag@1Pdop, d) Ag@6Pdop, e) Ag@12Pdop, f) Ag@18Pdop, g) Ag@24Pdop, h) Chemical constituents obtained by EDAX

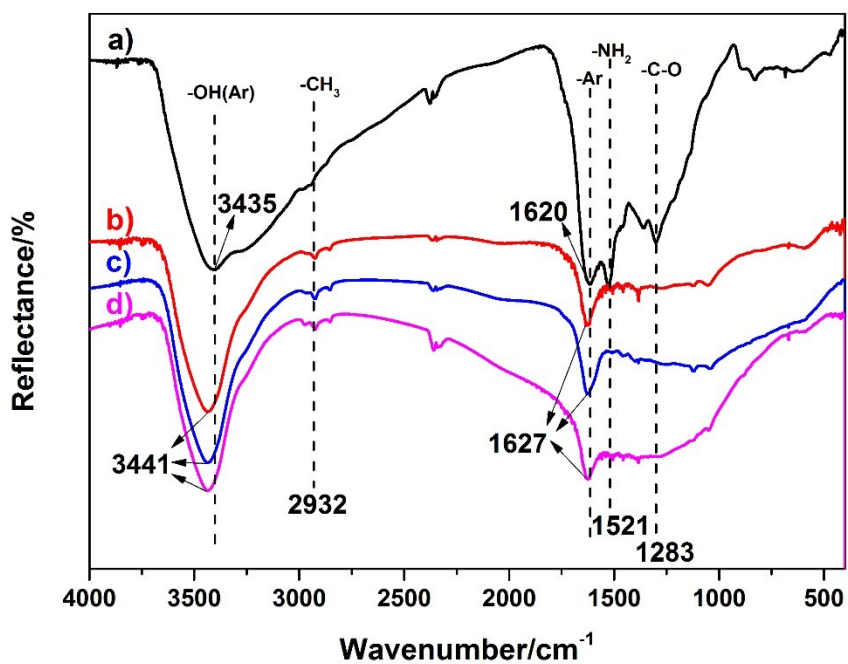

Fig. S3 FT-IR spectra of the films, a) Pdop, b) Ag@6Pdop, c) Ag@12Pdop, d) Ag@24Pdop

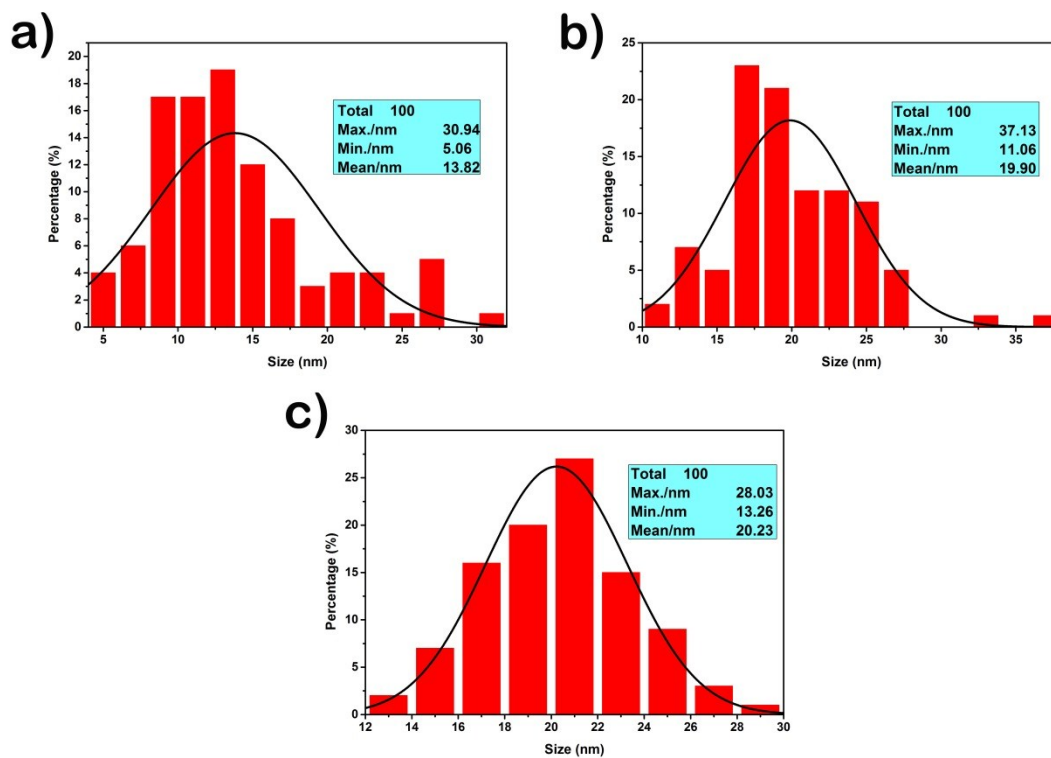

Fig. S4 Size distribution of Ag NPs of Ag@Pdop, a) Ag@6Pdop, b) Ag@12Pdop, and c) Ag@24Pdop
